# Supplementary material for: Hydrophilic titanium surfaces reduce neutrophil inflammatory response and NETosis
Source: Royal Society of Chemistry journal article supplement (doi:10.1039/c9bm01474h), 2020-01-01

Electronic Supplementary Material (ESI) for Biomaterials Science.  
This journal is © The Royal Society of Chemistry 2020

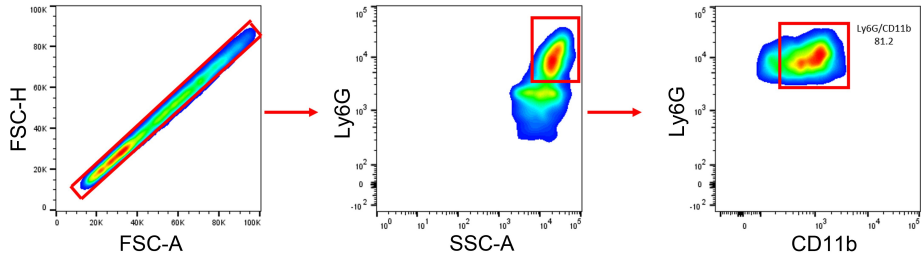

Supplement: c9bm01474h2.pdf [file c9bm01474h2.pdf]
